14 **Abstract**

15 Few viruses have been documented in plants outside angiosperms. Endogenous viral  
16 elements (paleoviruses) provide ‘molecular fossils’ for studying the deep history and  
17 macroevolution of viruses. Endogenous plant pararetroviruses (EPRVs) are  
18 widespread across angiosperms, but little is known about EPRVs in earlier branching  
19 plants. Here we use a large-scale phylogenomic approach to investigate the diversity  
20 and macroevolution of plant pararetroviruses (formally known as *Caulimoviridae*).  
21 We uncover an unprecedented and unappreciated diversity of EPRVs in the genomes  
22 of gymnosperms and ferns. The known angiosperm viruses only constitute a minor  
23 part of the *Caulimoviridae* diversity. By characterizing the distribution of EPRVs, we  
24 show that no major euphyllophyte lineages escape the activity of *Caulimoviridae*,  
25 raising the possibility that many exogenous *Caulimoviridae* remain to be discovered  
26 in euphyllophytes. We find that the copy numbers of EPRVs are generally high,  
27 suggesting that EPRVs define a unique group of repetitive elements and represent  
28 major components of euphyllophyte genomes. Phylogenetic analyses reveal an  
29 ancient monilophyte origin of *Caulimoviridae* and at least three independent origins  
30 of *Caulimoviridae* in angiosperms by cross-division transmissions. Our findings  
31 uncover the remarkable diversity of *Caulimoviridae* and have important implications  
32 in understanding the origin and macroevolution of plant pararetroviruses.

33 Endogenous viral elements (EVEs), the viral sequences integrated into their hosts'  
34 genomes, document past virus (paleovirus) infections and provide 'molecular fossils'  
35 for studying the deep history of viruses<sup>1</sup>. EVEs lay the foundation of an emerging  
36 field, Paleovirology<sup>1,2</sup>. The best characterized EVEs are endogenous retroviruses  
37 (ERVs)<sup>3</sup>. The replication of retroviruses requires integration into their hosts' genomes.  
38 On occasion, retroviruses infect germ lines of their hosts, and the integrated  
39 retroviruses, namely ERVs, become vertically inherited. ERVs are widespread and  
40 highly abundant in the genomes of vertebrates<sup>3</sup>; for example, ERVs make up 5%-8%  
41 of the human genome<sup>4</sup>. Recently, endogenous non-retroviral elements have been  
42 increasingly identified by comparative genomic analyses, which reveal the remarkable  
43 diversity, deep history, and macroevolution of related viruses<sup>5,6</sup>. EVEs (especially  
44 ERVs) were pervasively co-opted for the hosts' biology, ranging from placentation, to  
45 inhibition of exogenous viral infection, to regulation of innate immunity<sup>7-9</sup>.

46

47 Like retroviruses, two families of viruses with double-stranded DNA genomes  
48 replicate through RNA intermediates, known as pararetroviruses or DNA  
49 reverse-transcribing viruses<sup>10</sup>. Unlike retroviruses, these pararetroviruses lack  
50 integrase, and thus integration into host genomes is not essential for their replication.  
51 Pararetroviruses infect vertebrates (*Hepadnaviridae*) and plants (*Caulimoviridae*).  
52 Evolutionary analyses suggest that *Hepadnaviridae* and *Caulimoviridae* originated  
53 independently from retrotransposons with long terminal repeats (LTRs)<sup>11</sup>.  
54 Endogenous hepadnaviruses have been increasingly identified in the genomes of  
55 many species of Aves and reptiles<sup>12-14</sup>. The copy number of endogenous  
56 hepadnaviruses in the host genomes is very low (usually around ten copies)<sup>12-14</sup>. The  
57 identification of endogenous hepadnaviruses reveals the prevalent nature and deep  
58 history (more than 207 million years) of *Hepadnaviridae* in vertebrates<sup>12-15</sup>.

59

60 The *Caulimoviridae* family, pararetroviruses infecting plants, is classified into  
61 eight genera, namely *Caulimovirus*, *Soymovirus*, *Tungrovirus*, *Badnavirus*,  
62 *Solendovirus*, *Cavemovirus*, *Rosadnavirus*, and *Petuvirus*<sup>16</sup>. The genome size of

63 *Caulimoviridae* is usually between 6,000 and 8,000 base pairs (bps), encoding one to  
64 eight open reading frames (ORFs). The proteins (or domains) common to  
65 *Caulimoviridae* include movement protein (MP), coat protein (CP), aspartic protease  
66 (AP or PR), reverse transcriptase (RT), and RNase H1 (RH)<sup>16</sup>. While the replication of  
67 *Caulimoviridae* does not require integration into host genomes, endogenous plant  
68 pararetroviruses (EPRVs) were identified in many angiosperms at pre-genomic era<sup>17</sup>,  
69 for example banana<sup>18</sup> and tobacco<sup>19</sup>. Genome-scale data provide important resource to  
70 explore the distribution and diversity of EPRVs within plant genomes, which would  
71 improve our understanding of the macroevolution of *Caulimoviridae* and the  
72 relationship between viruses and their hosts. By mining a variety of plant genomes,  
73 Geering et al.<sup>20</sup> identified a novel lineage of EPRVs in flowering plants (angiosperms),  
74 which was designated ‘Florendovirus’ and was thought to constitute a new genus  
75 within *Caulimoviridae*. However, EPRVs have not been detected in the genomes of  
76 plants outside angiosperms<sup>20</sup>.

77

78 In this study, we use a large-scale phylogenomic approach to investigate whether  
79 EPRVs are present in the genomes of plants outside angiosperms. By mining ten  
80 gymnosperm and six fern genomes, we identified EPRVs in the genomes of nearly all  
81 these gymnosperms and ferns. Phylogenetic analyses using the newly identified  
82 EPRVs together with other angiosperm viruses reveal an unappreciated diversity of  
83 *Caulimoviridae* and show that the known angiosperm viruses only constitute a minor  
84 part of the *Caulimoviridae* diversity. The newly identified EPRVs in gymnosperms  
85 and ferns provide important and novel insights into the diversity, distribution, and  
86 macroevolution of *Caulimoviridae*.

87

## 88 **Results**

### 89 **Identification of EPRVs in gymnosperms and ferns**

90 We used a combined similarity search and phylogenetic analysis approach to  
91 screen the genomes of ten gymnosperms, six ferns, and four other earlier branching  
92 plant species (*Selaginella moellendorffii*, *Physcomitrella patens*, *Marchantia*

93 *polymorpha*, and *Klebsormidium flaccidum*) for the presence of EPRVs (Fig. 1 and  
94 Supplemental Table 1). Briefly, similarity search with the protein sequences of  
95 representative *Caulimoviridae* was performed against these plant genomes (Fig. 1 and  
96 Supplemental Table 1). Given RT and RH of *Caulimoviridae* share significant  
97 similarity with retrotransposons and other reverse-transcribing viruses, EPRVs were  
98 further identified and confirmed by phylogenetic analyses (see Methods). We found  
99 that EPRVs are present in the genomes of nearly all the gymnosperms and ferns  
100 investigated in this study (Fig. 1), suggesting that EPRVs are prevalent and  
101 widespread in gymnosperms and ferns. EPRVs were not identified in the genome of  
102 the fern *Ceratopteris richardii*, which does not necessarily indicate the absence of  
103 EPRVs but is more likely due to the low-density coverage (1.082×) of its genome  
104 sequencing (only 1% of its genome is covered by the genome assembly)<sup>21</sup>. No EPRV  
105 was detected in the genomes of the lycophyte *S. moellendorffii*, the moss *P. patens*,  
106 the liverwort *M. polymorpha*, and the charophyte *K. flaccidum* (Fig. 1). Together with  
107 previous reports of EPRVs in angiosperms<sup>17-20</sup>, we conclude that EPRVs are  
108 widespread in the genomes of euphyllophytes (ferns and seed plants).

109  
110 The copy numbers of EPRVs within the genomes of gymnosperms and ferns  
111 appear to vary widely across plant species. We estimated that the genomes of the  
112 gymnosperms and ferns contain 112 – 20,579 copies of EPRVs (Table 1). However,  
113 the genomes of some gymnosperms and ferns are of low coverage, these estimated  
114 numbers should be taken with cautions. On the other hand, for the three genomes  
115 that >90% are covered by genome assembly (*Pinus taeda*, *Picea glauca*, and *Ginkgo*  
116 *biloba*), the EPRV copy numbers were estimated to be 6,733, 2,520, and 481,  
117 respectively. Our results suggest that EPRVs might represent major components of  
118 plant genomes.

119

## 120 **Diversity and classification of *Caulimoviridae***

121 To explore the relationship between the newly identified gymnosperm and fern  
122 EPRVs and the known angiosperm *Caulimoviridae*, we inferred a phylogeny of

123 representative exogenous and endogenous viruses of *Caulimoviridae* using the highly  
124 conserved RT-RH proteins with the retrotransposon *Ty3* as the outgroup. Our  
125 phylogenetic analysis reveals an extraordinarily large diversity of the *Caulimoviridae*  
126 family, which has never been appreciated previously (Fig. 2). The known eight viral  
127 genera and florendoviruses fell well within the diversity of EPRVs of gymnosperms  
128 and ferns. It follows that the previously known angiosperm *Caulimoviridae* constitute  
129 only a minor part of its diversity.

130

131 Our phylogenetic analysis identified at least seven monophyletic groups of  
132 EPRVs with high supports (Bayesian posterior probability > 0.95) in gymnosperms  
133 and ferns. These clades were designated gymnosperm endogenous florendovirus-like  
134 virus 1-3 (GEFLV 1-3), fern endogenous florendovirus-like virus (FEFLV),  
135 gymnosperm endogenous caulimovirus-like virus 1-2 (GECLV 1-2), and fern  
136 endogenous caulimovirus-like virus (FECLV), respectively (Fig. 2). The host of each  
137 clade is restricted to one plant division (except GECLV 1) (Fig. 2). The divergence  
138 within one of these clades is comparable to and even greater than that of one known  
139 *Caulimoviridae* genus. Some gymnosperm and fern EPRVs are not readily classified,  
140 either because one virus formed one branch or because the branches are not strongly  
141 supported.

142

### 143 **Macroevolutionary mode of *Caulimoviridae***

144 To estimate the relative importance of co-speciation and host switching in the  
145 macroevolution of *Caulimoviridae*, we performed a global assessment of the  
146 correspondence between *Caulimoviridae* and host phylogenetic trees using the  
147 event-based approach. The analyses found no significant signal for co-speciation ( $p$   
148 values > 0.05; Table 2), suggesting co-speciation might not play a predominant role in  
149 the diversification of *Caulimoviridae*.

150

151 Our phylogenetic analysis shows that some newly described fern EPRVs occupy  
152 important phylogenetic positions -- basal to all the other known *Caulimoviridae*.

153 Ancestral state reconstruction reveals that the *Caulimoviridae* family originated in  
154 ferns (Supplemental Fig. 1). Our phylogenetic analysis also shows that the  
155 angiosperm viruses form three independent monophyletic groups: two consist of  
156 known eight genera of exogenous viruses and one consists of florendoviruses (Fig. 2).  
157 The three angiosperm viral groups are only distantly related to each other. The  
158 phylogenetic relationship among euphyllophyte viruses indicate that the angiosperm  
159 viruses originated multiple times probably through cross-division transmission from  
160 gymnosperms.

161

### 162 **Genome structure evolution of *Caulimoviridae***

163 To explore the genome structure evolution within the *Caulimoviridae* family, we  
164 reconstructed the consensus genome sequences of EPRVs (Supplemental Data 1-5).  
165 Given the fern genomes are of low coverage, we only reconstructed the genomes of  
166 gymnosperm EPRVs, and one representative for each of the five gymnosperm EPRV  
167 clades were inferred. These gymnosperm EPRV genomes vary wildly in size (from  
168 6,061 to 8,109 bps) and ORF organization (Fig. 3 and Supplementary Data).

169 Conserved Domain (CD) searches show that protein domains common to all the  
170 EPRVs include MP, AP, RT, and RH, suggesting that the gymnosperm EPRVs exhibit  
171 a similar protein architecture as the angiosperm *Caulimoviridae* (Fig. 3). No CP  
172 homologs were identified in the consensus genome sequences, possibly due to the  
173 rapid nature of its evolution. However, we identified the zinc-finger CCHC motif, a  
174 hallmark of the CP protein, in PtaeV\_2 (GECLV1) and GbilV (GECLV2) (Fig. 3). CD  
175 searches did not find any integrase-like domain, a pattern similar to the angiosperm  
176 *Caulimoviridae* and indicates integration might not be necessary for the replication of  
177 gymnosperm EPRVs either.

178

### 179 **Age estimate of EPRV bursts**

180 Because the genomes of loblolly pine (*P. taeda*) and ginkgo (*G. biloba*) were of  
181 relatively high quality and contain rather distinct numbers of EPRVs (Table 1), they  
182 were used to infer the evolutionary dynamics of EPRVs within the host genomes.

183 Mixture model analyses of the genetic divergence between EPRV copies and their  
184 consensus nucleotide sequence show that there are four and three peaks in *P. taeda*  
185 and *G. biloba* (Supplemental Table 2), suggesting at least four and three independent  
186 EPRV integration events occurring along the lineages leading to *P. taeda* and *G.*  
187 *biloba*, respectively. Based on the mixture analyses and phylogenetic analyses  
188 (Supplemental Fig. 2), the ERPVs within the genomes of *P. taeda* and *G. biloba* were  
189 classified into four and three families.

190

191 We failed to find any orthologous integration of EPRVs in different species and  
192 cannot directly estimate the time of viral integration. The median pairwise genetic  
193 distance within each family was calculated to examine the age of burst for each EPRV  
194 family<sup>22, 23</sup> (Supplemental Table 3). Our results show that the EPRV proliferation  
195 dynamics were of difference between *P. taeda* and *G. biloba* (Supplemental Table 3).  
196 But we found all of the EPRV families investigated here experienced proliferation  
197 peaks tens or hundreds of million years ago. Consistently, the EPRV copies contain  
198 many frame-shift mutations and premature stop codons (Supplemental Fig. 4).  
199 However, those analyses come with two caveats: i) it is uncertain whether the EPRV  
200 proliferation activity within the host genome follows the Gaussian distribution; ii) the  
201 evolutionary rate of EPRVs remains unclear. Nevertheless, our results suggest that  
202 EPRVs evolved within their host genomes for hundreds of millions of years and  
203 indicate an ancient origin of *Caulimoviridae*.

204

## 205 Discussion

206 In this study, we report the identification of EPRVs within the genomes of  
207 gymnosperms and ferns. Together with the previous reports of exogenous and  
208 endogenous *Caulimoviridae* in angiosperms, our results demonstrate that all the major  
209 lineages of euphyllophytes (ferns and seed plants) are/were infected by the  
210 *Caulimoviridae* family. No EPRVs detected in the genome of *C. richardii* does not  
211 necessarily mean the absence of EPRVs, which is probably due to the low coverage



212 nature of its genome assembly. Few viruses have been documented in plant species  
213 outside angiosperm<sup>24</sup>. The identification of EPRVs in gymnosperms and ferns makes  
214 *Caulimoviridae* the only known viral family that infects all major lineages of  
215 euphyllophytes.

216

217 Our findings show that the newly identified EPRVs exhibit an unprecedented  
218 diversity, and the known angiosperm viral diversity only accounts for a minority of  
219 the *Caulimoviridae* diversity. The current *Caulimoviridae* classification system<sup>16</sup>  
220 cannot readily account for the diversity of EPRVs in gymnosperms and ferns. Indeed,  
221 the divergence within one clade of gymnosperm or fern EPRVs is comparable to the  
222 divergence of one exogenous viral genus or florendoviruses. Therefore, an updated  
223 classification incorporating gymnosperm and fern EPRVs should be developed. Most  
224 of the EPRV clades lack the exogenous counterparts, either because the ancient viral  
225 lineages completely died out, or because many exogenous viruses remain to be  
226 discovered.

227

228 Two possible macroevolutionary modes of *Caulimoviridae* could be conceived: i)  
229 Co-speciation model: the viruses have co-evolved with their euphyllophyte hosts  
230 for >400 million years and undergone sporadic cross-species transmission (Fig. 5a); ii)  
231 Cross-species transmission model: frequent cross-species transmissions predominated  
232 in the evolution of *Caulimoviridae* (Fig. 5b). In this study, we failed to find  
233 co-speciation signal between *Caulimoviridae* and its hosts, suggesting co-speciation  
234 might not be predominant in the macroevolution of *Caulimoviridae* (Table 2 and  
235 Supplemental Fig. 3). Indeed, it appears that the angiosperm viruses originated  
236 multiple times via independent cross-division transmission events (gymnosperms to  
237 angiosperms). For plant viruses, cross-division transmission events were rarely  
238 documented, partially because much remains unknown about the virosphere in plants  
239 outside angiosperms. Given multiple cross-division transmission events took place in  
240 *Caulimoviridae*, we think that cross-division transmission might not be a rare event  
241 for other plant viruses.

242

243 Phylogenetic analysis and ancestral state reconstruction show that the  
244 *Caulimoviridae* family might have a monilophyte origin (Supplemental Fig. 1), which  
245 is compatible with the fact that we did not find any EPRV in earlier branching plants  
246 (lycophytes and nonvascular plants). One might argue that the absence of EPRVs in  
247 earlier branching plants is due to no viral integration occurring. However, this  
248 possibility seems to be unlikely, given viral integration is so widespread in  
249 euphyllophytes. The paleoviruses provide ‘molecular fossils’ for estimating the age of  
250 related viruses. Previously, the integration of banana streak virus into the *Musa*  
251 *balbisiana* genome was estimated to occur 0.63 million years ago<sup>25, 26</sup>. The  
252 endogenization of florendoviruses in *Oryza* species was estimated to take place at  
253 least 1.8 million years ago<sup>20</sup>. Although we cannot directly date when the EPRV  
254 endogenization events occurred by finding orthologous integration of EPRVs in  
255 closely related species, the proliferation dynamics analyses of EPRVs within two  
256 representative genomes indicate they might have activated within the host genomes  
257 for hundreds of millions of years. Taken together, our findings pinpoint a possible  
258 ancient monilophyte origin of *Caulimoviridae*.

259

260 Unlike EVEs of non-retroviral source, the copy numbers of EPRVs are generally  
261 high (>1,000 copies for 10 out of 16 gymnosperm and fern species), suggesting that  
262 EPRVs contribute significantly to the complexity of host genomes. *Caulimoviridae*  
263 are closely related to LTR retrotransposons<sup>11</sup>. On the other hand, EPRVs lack LTRs,  
264 which makes it inappropriate to be classified as an LTR retrotransposon. It seems to  
265 be more appropriate to define EPRVs as a unique group of transposable elements<sup>19</sup>.

266

267 Our findings suggest that *Caulimoviridae* integrated into and amplified within  
268 host genomes multiple times. However, the integration and amplification mechanisms  
269 of EPRVs remain unclear, as the *Caulimoviridae* genomes lack integrase-like proteins  
270 and integration is not essential for their replication. Several potential mechanisms  
271 might be involved: i) Unlike the highly sequestered nature of animal germlines, plant

272 germline tissues might allow more frequent infections of viruses. However, the copy  
273 numbers of EVEs within animals seem to be generally similar to EVEs within plants<sup>5</sup>.  
274 <sup>6</sup>. It appears that the high copy numbers of EPRVs are due to its own biology. ii)  
275 EPRVs encode a ‘cryptic’ integrase without significant similarity with the known  
276 proteins that function in integration. No integrase domain was found in the *Petunia*  
277 *vein clearing virus* (PVCV) genome. But one of its proteins encodes two distinctive  
278 motifs [HHCC and DD(35)E] that are shared by the integrase domain of retroviruses  
279 and LTR retrotransposons<sup>27</sup>. However, it remains unknown whether that protein  
280 performs function similar to integrase. iii) Microhomology-mediated recombination  
281 between EPRV sequences and host sequences during host gap repair process could  
282 result in the integration of viral sequences into the host genomes<sup>17</sup>. This mechanism  
283 requires the free ends of open circular viral sequences produced during virus  
284 replication<sup>19,28</sup>. iv) Like short interspersed elements (SINE), EPRVs might integrate  
285 and amplify themselves within the host genomes via hijacking the integrase of other  
286 retrotransposons<sup>29,30</sup>.

287

## 288 **Method**

### 289 **Identification of EPRVs in plant genomes**

290 The genome sequences of twenty plant species were used to screen the presence  
291 of EPRVs, including ten gymnosperms (*P. taeda*, *Pinus lambertiana*, *Pinus sylvestris*,  
292 *Picea abies*, *Picea glauca*, *G. biloba*, *Gnetum gnemon*, *Juniperus communis*, *Taxus*  
293 *baccata*, and *Abies sibirica*), six ferns (*C. richardii*, *Dipteris conjugata*, *Plagiogyria*  
294 *formosana*, *Pteridium aquilinum*, *Polypodium glycyrrhiza*, and *Cystopteris protrusa*),  
295 one moss (*P. patens*), one liverwort (*M. polymorpha*), one lycophyte (*S.*  
296 *moellendorffii*), and one charophyte (*K. flaccidum*)<sup>21,31,32</sup> (Table S1). To identify  
297 putative EPRVs within these genomes, we employed a two-step phylogenomic  
298 approach. First, the tBLASTn algorithm was employed to search against the plant  
299 genomes using the RT-RH domain sequences of *Rice tungro bacilliform virus* (RTBV)  
300 and PVCV as queries with an *e* cutoff value of 10<sup>-10</sup>. Next, all the significant hits

301 obtained were aligned with RT-RH sequences of representative LTR retrotransposons,  
302 retroviruses, *Hepadnaviridae*, and *Caulimoviridae*<sup>33</sup> using MAFFT with default  
303 parameters<sup>34</sup>. Putative EPRVs, which form a monophyletic group with other  
304 *Caulimoviridae* with high support values, were identified based on phylogenetic  
305 analyses. EPRVs were confirmed by further rounds of phylogenetic analyses with  
306 putative EPRVs and representative LTR retrotransposons, retroviruses, *Hepadnaviridae*,  
307 and *Caulimoviridae*. Phylogenetic analyses were performed using an approximate  
308 maximum likelihood method implemented in FastTree 2.1.9 with default parameters<sup>35</sup>.  
309 The copy number of EPRVs within each species was then counted. If length between  
310 hits was less than 5,000 bps and the hits were in the same order as the query, the hits  
311 were treated as a single copy.

312

### 313 **Phylogenetic analysis**

314 To further analyze the relationship among *Caulimoviridae*, phylogenetic analysis  
315 was performed using the RT-RH protein sequences from representative EPRV  
316 sequences of each gymnosperm and fern species, exogenous viruses, and  
317 florendoviruses. The *Ty3* retrotransposon sequence was used as the outgroup. These  
318 protein sequences were aligned using MAFFT algorithm with an accurate method  
319 with the L-INS-i strategy<sup>34</sup>. Ambiguous regions within the alignment were removed  
320 using Gblocks 0.91b<sup>36</sup>. The phylogenetic analysis was performed using a Bayesian  
321 method implemented in MrBayes 3.2.6 (ref. 37). The RtRev substitution model was  
322 used. A total of 17,000,000 generations in four chains were run, sampling posterior  
323 trees every 100 generations. The first 25% of the posterior trees were discarded for  
324 further analysis.

325

### 326 **Reconstruction of consensus genome sequences**

327 Relatively complete EPRV sequences with *MP-AP-RT-RH* domains with  
328 extended flanking regions (~5,000 bps for each end) were extracted. These sequences  
329 were then used as queries to search sequences with high similarity within their own  
330 host genome using the BLASTn algorithm with an *e* cutoff value of  $10^{-25}$ . The

331 significant hits were aligned using MAFFT<sup>34</sup> and consensus sequences were generated  
332 using Geneious 10 (ref. 38) and manually edited. ORFs with the minimum size of 500  
333 were found using Geneious 10 (ref. 38). Protein domains within these reconstructed  
334 genomes were detected using the CD search<sup>39</sup>.

335

### 336 **Analysis of EPRV activity within host genomes**

337 Because the genomes of *P. taeda* and *G. biloba* were of relatively high quality, we  
338 used their genomes to infer the evolutionary dynamics of EPRVs within the host  
339 genomes. The *AP-RT-RH* nucleotide sequences with length >500 bps of all the EPRVs  
340 within *P. taeda* and *G. biloba* genomes were extracted independently. These  
341 sequences were aligned using MAFFT and consensus sequences were inferred using  
342 Geneious 10 (ref. 38). The genetic distance between the consensus sequences and  
343 EPRVs was calculated based on the Kimura two-parameter model. To identify  
344 significant peaks in the genetic distance data sets, Gaussian mixture models were  
345 fitted using the R package mclust. The number of components (each component is  
346 modeled by the Gaussian distribution) was estimated by fitting models. The Bayesian  
347 Information Criterion (BIC) was used as the model selection criterion.

348

349 The phylogenetic trees of the *AP-RT-RH* nucleotide sequences extracted above  
350 within each host genome were reconstructed using FastTree 2.1.9 with a GTR+CAT  
351 model. The different EPRV families within the phylogenetic trees were allocated  
352 based on the results by mixture model analyses. The nucleotide sequences of each  
353 EPRV family were extracted and aligned using MAFFT<sup>34</sup>. Pairwise genetic distances  
354 were calculated based on the Kimura two-parameter model. The age of burst ( $T$ ) for  
355 each EPRV family was estimated through  $T = D/2\mu$ , where  $D$  represents the median  
356 pairwise distance and  $\mu$  represents the evolutionary rate of host ( $\sim 1.43 \times 10^{-9}$ - $2.2 \times 10^{-9}$   
357 substitutions per site per year<sup>31</sup>).

358

### 359 **Co-speciation analysis**

360 We explore the host-virus co-speciation signal at the level of class, for the

361 complex evolutionary history of EPRVs after integration might complicate  
362 co-speciation analysis. The relationships between virus and host phylogenetic trees  
363 were assessed using an event-based method implemented in Jane 4 (ref. 40). Briefly,  
364 five events (cospeciation, duplication, duplication & host switch, loss and failure to  
365 diverge) were assigned to a cost. The number of each event was estimated by finding  
366 the solution with the minimum total cost. The event-cost schemes  
367 (cospeciation-duplication-duplication & host switch-loss-failure to diverge) were set  
368 as follows, -1-0-0-0-0 (refs. 41, 42) and 0-1-1-2-0 (ref. 40). Host-virus phylogeny  
369 congruence was assessed by statistical tests with both two randomization methods,  
370 random tip mapping and random parasite tree, with the sample size of 500.

371

### 372 **Reconstruction of ancestral states**

373 To detect the macroevolutionary pattern among *Caulimoviridae*, we performed  
374 ancestral state reconstruction with Mesquite 3.10 (ref. 43). We assigned the 96 viral  
375 taxa (Fig. 2) using their hosts (gymnosperm, angiosperm, and fern) as characters. For  
376 the outgroup Ty3, a '?' character was assigned. The parsimony model was used to  
377 trace character evolution over the posterior trees sampled in the aforementioned  
378 Bayesian analysis.

379

### 380 **Acknowledgements**

381 This work was supported by the Natural Science Foundation of Jiangsu Province  
382 (BK20161016) and the Priority Academic Program Development (PAPD) of Jiangsu  
383 Higher Education Institutions.

384

### 385 **Author contributions**

386 G.-Z.H. designed the study. G.Z. and G.-Z.H performed the experiments. G.-Z.H  
387 and G.Z. analyzed the data and wrote the manuscript.

388

389 **Competing Financial Interests**

390 The authors declare no competing financial interests.

391

392 **References**

393 1. Katzourakis, A. & Gifford, R. J. Endogenous Viral Elements in Animal Genomes.  
394 *PLOS Genet.* **6**, e1001191 (2010).

395 2. Emerman, M. & Malik, H. S. Paleovirology--modern consequences of ancient  
396 viruses. *PLOS Biol.* **8**, e1000301 (2010).

397 3. Hayward, A., Grabherr, M. & Jern, P. Broad-scale phylogenomics provides  
398 insights into retrovirus–host evolution. *Proc. Natl Acad. Sci. USA* **110**,  
399 20146-20151 (2013).

400 4. Belshaw, R. *et al.* Long-term reinfection of the human genome by endogenous  
401 retroviruses. *Proc. Natl Acad. Sci. USA* **101**, 4894–4899 (2004).

402 5. Feschotte, C. & Gilbert, C. Endogenous viruses: insight into viral evolution and  
403 impact on host biology. *Nat. Rev. Genet.* **13**, 283-296 (2012).

404 6. Aiewsakun, P. & Katzourakis, A. Endogenous viruses: Connecting recent and  
405 ancient viral evolution. *Virology* **479-480**, 26-37 (2015).

406 7. Aswad, A. & Katzourakis, A. Paleovirology and virally derived immunity. *Trends*  
407 *Ecol. Evol.* **27**, 627–636 (2012).

408 8. Chuong, E. B., Elde, N. C. & Feschotte, C. Regulatory evolution of innate  
409 immunity through co-option of endogenous retroviruses. *Science* **351**, 1083–1087  
410 (2016).

411 9. Esnault, C., Cornelis, G., Heidmann, O. & Heidmann, T. Differential  
412 Evolutionary Fate of an Ancestral Primate Endogenous Retrovirus Envelope  
413 Gene, the EnvV *Syncytin*, Captured for a Function in Placentation. *PLOS Genet.*  
414 **9**, e1003400 (2013).

415 10. Temin, H. M. Reverse transcription in the eukaryotic genome: retroviruses,  
416 pararetroviruses, retrotransposons, and retrotranscripts. *Mol. Biol. Evol.* **2**,  
417 455-468 (1985).

- 418 11. Xiong, Y. & Eickbush, T. H. Origin and evolution of retroelements based upon  
419 their reverse transcriptase sequences. *EMBO J.* **9**, 3353-62 (1990).
- 420 12. Gilbert, C. & Feschotte, C. Genomic Fossils Calibrate the Long-Term Evolution  
421 of Hepadnaviruses. *PLOS Biol.* **8**, e1000495 (2010).
- 422 13. Gilbert, C. *et al.* Endogenous hepadnaviruses, bornaviruses and circoviruses in  
423 snakes. *Proc. Biol. Sci.* **281**, 20141122 (2014).
- 424 14. Suh, A. *et al.* Early mesozoic coexistence of amniotes and hepadnaviridae. *PLOS*  
425 *Genet.* **10**, e1004559 (2014).
- 426 15. Dill, J. A. *et al.* Distinct viral lineages from fish and amphibians reveal the  
427 complex evolutionary history of hepadnaviruses. *J. Virol.* **90**, 7920-7933 (2016).
- 428 16. King, A. M. Q., Adams, M. J., Carstens, E. B. & Lefkowitz, E. J. *Virus Taxonomy:*  
429 *Classification and Nomenclature of Viruses: Ninth Report of the International*  
430 *Committee on Taxonomy of Viruses.* (Elsevier Academic Press, 2012).
- 431 17. Staginnus, C. & Richert-Pöggeler, K. R. Endogenous pararetroviruses: two-faced  
432 travelers in the plant genome. *Trends Plant Sci.* **11**, 485-91 (2006).
- 433 18. Harper, G., Osuji, J. O., Heslop-Harrison, J. S. & Hull, R. Integration of banana  
434 streak badnavirus into the *Musa* genome: molecular and cytogenetic evidence.  
435 *Virology* **255**, 207-213 (1999).
- 436 19. Jakowitsch, J., Mette, M. F., van der Winden, J., Matzke, M. A. & Matzke, A. J.  
437 M. Integrated pararetroviral sequences define a unique class of dispersed  
438 repetitive DNA in plants. *Proc. Natl Acad. Sci. USA* **96**, 13241-13246 (1999).
- 439 20. Geering, A. D. W. *et al.* Endogenous florendoviruses are major components of  
440 plant genomes and hallmarks of virus evolution. *Nat. Commun.* **5**, 5269 (2014).
- 441 21. Wolf, P. G. *et al.* An Exploration into Fern Genome Space. *Genome Biol. Evol.* **7**,  
442 2533-2544 (2015).
- 443 22. Vandewege, M. W., Platt, R. N., Ray, D. A. & Hoffmann, F. G. Transposable  
444 Element Targeting by piRNAs in Laurasiatherians with Distinct Transposable  
445 Element Histories. *Genome Biol. Evol.* **8**, 1327-1337 (2016).
- 446 23. Ray, D. A. *et al.* Multiple waves of recent DNA transposon activity in the bat,  
447 *Myotis lucifugus*. *Genome Res.* **18**, 717-728 (2008).



- 448 24. Hull, R. *Plant Virology (Fifth edition)*, p47, (Elsevier Academic Press, 2014).
- 449 25. Gayral, P. *et al.* A single Banana streak virus integration event in the banana  
450 genome as the origin of infectious endogenous pararetrovirus. *J. Virol.* **82**,  
451 6697-710 (2008).
- 452 26. Gayral, P. *et al.* Evolution of endogenous sequences of banana streak virus: what  
453 can we learn from banana (*Musa sp.*) evolution? *J. Virol.* **84**, 7346-59 (2010).
- 454 27. Richert-Pöggeler, K. R. & Shepherd, R. J. Petunia vein-clearing virus: a plant  
455 pararetrovirus with the core sequences for an integrase function. *Virology* **236**,  
456 137-146 (1997).
- 457 28. Kunii, M. *et al.* Reconstruction of putative DNA virus from endogenous rice  
458 tungro bacilliform virus-like sequences in the rice genome: implications for  
459 integration and evolution. *BMC Genomics* **5**, 80 (2004).
- 460 29. Beck, C. R., Garcia-Perez, J. L., Badge, R. M. & Moran, J. V. LINE-1 elements in  
461 structural variation and disease. *Annu. Rev. Genomics Hum. Genet.* **12**, 187-215  
462 (2011).
- 463 30. Richardson, S. R. *et al.* The Influence of LINE-1 and SINE Retrotransposons on  
464 Mammalian Genomes. *Microbiol Spectr.* **3**, MDNA3-0061-2014 (2015).
- 465 31. Nystedt, B. *et al.* The Norway spruce genome sequence and conifer genome  
466 evolution. *Nature* **497**, 579-584 (2013).
- 467 32. Guan, R. *et al.* Draft genome of the living fossil Ginkgo biloba. *GigaScience* **5**,  
468 49 (2016).
- 469 33. Llorens, C., Muñoz-Pomer, A., Bernad, L., Botella, H. & Moya, A. Network  
470 dynamics of eukaryotic LTR retroelements beyond phylogenetic trees. *Biol.*  
471 *Direct.* **4**, 41 (2009).
- 472 34. Katoh, K. & Standley, D. M. MAFFT Multiple Sequence Alignment Software  
473 Version 7: Improvements in Performance and Usability. *Mol. Biol. Evol.* **30**,  
474 772-780 (2013).
- 475 35. Price, M. N., Dehal, P. S. & Arkin, A. P. FastTree 2 – Approximately  
476 Maximum-Likelihood Trees for Large Alignments. *PLoS One* **5**, e9490 (2010).
- 477 36. Talavera, G. & Castresana, J. Improvement of phylogenies after removing

- 478       divergent and ambiguously aligned blocks from protein sequence alignments.  
479       *Syst. Biol.* **56**, 564-577 (2007).
- 480   37. Ronquist, F. *et al.* MrBayes 3.2: Efficient Bayesian Phylogenetic Inference and  
481       Model Choice Across a Large Model Space. *Syst. Biol.* **61**, 539-542 (2012).
- 482   38. Kearse, M. *et al.* Geneious Basic: An integrated and extendable desktop software  
483       platform for the organization and analysis of sequence data. *Bioinformatics* **28**,  
484       1647-1649 (2012).
- 485   39. Marchler-Bauer, A. *et al.* CDD: NCBI's conserved domain database. *Nucleic*  
486       *Acids Res.* **43**, D222-D226 (2015).
- 487   40. Conow, C., Fielder, D., Ovadia, Y. & Libeskind-Hadas, R. Jane: a new tool for the  
488       cophylogeny reconstruction problem. *Algorithms Mol. Biol.* **5**, 16 (2010).
- 489   41. Aiewsakun, P. & Katzourakis, A. Marine origin of retroviruses in the early  
490       Palaeozoic Era. *Nat. Commun.* **8**, 13954 (2017).
- 491   42. Ronquist, F. Phylogenetic approaches in coevolution and biogeography. *Zool. Scr.*  
492       **26**, 313-322 (1997).
- 493   43. Maddison, W. P. & Maddison, D. R. Mesquite: a modular system for evolutionary  
494       analysis. Version 3.10. (2016) Available at: <http://mesquiteproject.org>. Accessed  
495       on 28 Jun 2016.
- 496   44. Chang, C., Bowman, J. L. & Meyerowitz, E. M. Field Guide to Plant Model  
497       Systems. *Cell* **167**, 325-339 (2016).
- 498   45. Chaw, S. M., Zharkikh, A., Sung, H. M., Lau, T. C. & Li, W. H. Molecular  
499       phylogeny of extant gymnosperms and seed plant evolution: analysis of nuclear  
500       18S rRNA sequences. *Mol. Biol. Evol.* **14**, 56-68 (1997).
- 501   46. Bowe, L. M., Coat, G. & dePamphilis, C. W. Phylogeny of seed plants based on  
502       all three genomic compartments: extant gymnosperms are monophyletic and  
503       Gnetales' closest relatives are conifers. *Proc. Natl Acad. Sci. USA* **97**, 4092-4097  
504       (2000).

505 **Table 1. Copy number of EPRVs identified and estimated in plant genomes**

506

| Species                           | Division        | Proportion of genome covered by assembly (%) | No. of EPRVs identified | No. of EPRVs estimated <sup>2</sup> |
|-----------------------------------|-----------------|----------------------------------------------|-------------------------|-------------------------------------|
| <i>Pinus lambertiana</i>          | Pinophyta       | 89.04                                        | 4556                    | 5117                                |
| <i>Pinus taeda</i>                | Pinophyta       | 92.00                                        | 6194                    | 6733                                |
| <i>Picea glauca</i>               | Pinophyta       | 100                                          | 2520                    | 2520                                |
| <i>Juniperus communis</i>         | Pinophyta       | 16.04                                        | 18                      | 112                                 |
| <i>Taxus baccata</i>              | Pinophyta       | 27.79                                        | 112                     | 403                                 |
| <i>Abies sibirica</i>             | Pinophyta       | 14.08                                        | 130                     | 923                                 |
| <i>Pinus sylvestris</i>           | Pinophyta       | 30.20                                        | 314                     | 1040                                |
| <i>Picea abies</i>                | Pinophyta       | 61.22                                        | 1238                    | 2022                                |
| <i>Ginkgo biloba</i>              | Ginkgophyta     | 100                                          | 481                     | 481                                 |
| <i>Gnetum gnemon</i>              | Gnetophyta      | 55.66                                        | 1328                    | 2386                                |
| <i>Dipteris conjugata</i>         | Pteridophyta    | 9.51                                         | 144                     | 1515                                |
| <i>Plagiogyria formosana</i>      | Pteridophyta    | 0.31                                         | 64                      | 20579                               |
| <i>Ceratopteris richardii</i>     | Pteridophyta    | 3.11                                         | 0                       | 0                                   |
| <i>Pteridium aquilinum</i>        | Pteridophyta    | 6.34                                         | 57                      | 898                                 |
| <i>Polypodium glycyrrhiza</i>     | Pteridophyta    | 0.53                                         | 21                      | 3947                                |
| <i>Cystopteris protrusa</i>       | Pteridophyta    | 1.00                                         | 12                      | 1199                                |
| <i>Physcomitrella patens</i>      | Bryophyta       | ND <sup>1</sup>                              | 0                       | 0                                   |
| <i>Selaginella moellendorffii</i> | Lycopodiophyta  | ND <sup>1</sup>                              | 0                       | 0                                   |
| <i>Marchantia polymorpha</i>      | Marchantiophyta | ND <sup>1</sup>                              | 0                       | 0                                   |
| <i>Klebsormidium flaccidum</i>    | Charophyta      | ND <sup>1</sup>                              | 0                       | 0                                   |

507

508 <sup>1</sup> Not determined.

509 <sup>2</sup> No. of EPRVs estimated = No. of EPRVs identified/Proportion of genome covered by assembly.

510

**Table 2. Number of events experienced by virus lineages**

511

| Event costs <sup>1</sup> | Total cost | Cospeciation <sup>2</sup> | Duplication <sup>2</sup> | Duplication & host switching <sup>2</sup> | Loss <sup>2</sup> | Failure to diverge <sup>2</sup> | P-value <sup>3</sup> | P-value <sup>4</sup> |
|--------------------------|------------|---------------------------|--------------------------|-------------------------------------------|-------------------|---------------------------------|----------------------|----------------------|
| -1, 0, 0, 0, 0           | -8         | 8-8                       | 2-3                      | 13-14                                     | 7-20              | 0-0                             | >0.05                | >0.05                |
| 0, 1, 1, 2, 0            | 20         | 4-4                       | 3-5                      | 15-17                                     | 0-0               | 0-0                             | >0.05                | >0.05                |

512

513 <sup>1</sup>Event costs are for cospeciation, duplication, duplication & host switching, loss, and failure to  
514 diverge, respectively.

515 <sup>2</sup>Number of events is expressed as ranges that result in the same cost.

516 <sup>3</sup>Random tip mapping method with sample size of 500.

517 <sup>4</sup>Random parasite tree method with sample size of 500.

518 **Figure Legends**

519 **Figure 1. Distribution of EPRVs within plant genomes.** The phylogenetic  
520 relationship of plant species is based on Refs. 21, 31, 32, 44-46. Different plant  
521 divisions were labelled in different colors, and angiosperms, gymnosperms, and ferns  
522 were labelled in pink, green, and blue, respectively. The presence and absence of  
523 EPRVs were marked with solid and open circles around the related species. The  
524 half-filled circle indicates that EPRVs have been identified in some but not all the  
525 angiosperms.

526

527 **Figure 2. Phylogenetic relationship of representative exogenous and endogenous**  
528 ***Caulimoviridae*.** The phylogenetic tree was inferred based on the RT-RH protein  
529 sequences using a Bayesian method. The tree was rooted using the *Ty3* LTR  
530 retrotransposon as the outgroup. Bayesian posterior probabilities were shown on the  
531 selected nodes. *Caulimoviridae* of angiosperms, gymnosperms, and ferns were  
532 highlighted in orange, green, and blue, respectively. Virus abbreviations: CVMV,  
533 Cassava vein mosaic virus; SPCV, Sweet potato caulimo-like virus; SPVCV, Sweet  
534 potato vein clearing virus; TVCV, Tobacco vein clearing virus; BSOLV, Banana streak  
535 OL virus; CoYMV, Commelina yellow mottle virus; RTBV, Rice tungro bacilliform  
536 virus; CaMV, Cauliflower mosaic virus; FMV, Figwort mosaic virus; RYV, Rose  
537 yellow vein virus; PCSV, Peanut chlorotic streak virus; SoyCMV, Soybean chlorotic  
538 mottle virus; CitPRV, Citrus endogenous pararetrovirus; PVCV, Petunia vein clearing  
539 virus; VvinCV\_sc1, *Vitis vinifera* C virus sequence cluster 1; CsatAV, *Cucumis*  
540 *sativus* A virus; MescV, *Manihot esculenta* virus; FvesV\_sc1, *Fragaria vesca* virus  
541 sequence cluster 1; AtrichAV, *Amborella trichopoda* A virus; AtrichCV, *Amborella*  
542 *trichopoda* C virus; EgranV\_sc1, *Eucalyptus grandis* virus sequence cluster 1;  
543 OsatBV, *Oryza sativa* B virus; SbicV, *Sorghum bicolor* virus. Species abbreviations:  
544 Pabi, *Picea abies*; Pgla, *Picea glauca*; Ptae, *Pinus taeda*; Plam, *Pinus lambertiana*;  
545 Psyl, *Pinus sylvestris*; Asib, *Abies sibirica*; Gbil, *Ginkgo biloba*; Jcom, *Juniperus*  
546 *communis*; Ggne, *Gnetum gnemon*; Tbac, *Taxus baccata*; Pfor, *Plagiogyria formosana*;

547 Pgly, *Polypodium glycyrrhiza*; Cpro, *Cystopteris protrusa*; Paqu, *Pteridium aquilinum*;  
548 Pgly, *Polypodium glycyrrhiza*.

549

550 **Figure 3. Genome structures of representative gymnosperm EPRVs and**  
551 **exogenous *Caulimoviridae*.** Virus name abbreviation: RTBV, Rice tungro bacilliform  
552 virus; PVCV, Petunia vein clearing virus; Pglav\_1, *Picea glauca* virus 1; Pglav\_2,  
553 *Picea glauca* virus 2; Ptaev\_1, *Pinus taeda* virus 1; Ptaev\_2, *Pinus taeda* virus 2;  
554 GbilV, *Ginkgo biloba* virus. The tRNA<sup>Met</sup> which represents the beginning of the viral  
555 replication, was indicated by an asterisk. The grey lines represent the genomes and the  
556 rectangles represent the putative open reading frames (ORFs). The conserved protein  
557 domains were labelled in different colors. Abbreviations: MP, movement protein;  
558 PR/AP: protease/pepsin-like aspartate protease; RT, reverse transcriptase; RH,  
559 ribonuclease H1; zf\_CCHC, zinc-finger CCHC motif.

560

561 **Figure 4. Proliferation dynamics of EPRVs within the *P. taeda* (a and c) and *G.***  
562 ***biloba* (b and d) genomes.** Yellow rectangles in **a** and **c** represent the distribution of  
563 the genetic distances between EPRV copies and their consensus sequences. **b** and **d**  
564 indicate Gaussian mixture models fitted.

565

566 **Figure 5. The models of the *Caulimoviridae* macroevolution.** The evolution of plant  
567 hosts and viruses were indicated by blue lines and yellow dash lines, respectively. **(a)**  
568 Co-speciation model: the viruses have co-evolved with their euphyllophyte hosts and  
569 undergone sporadic cross-species transmission. **(b)** Cross-species transmission model:  
570 frequent cross-species transmission predominated in the evolution of *Caulimoviridae*.

EPRVs

bioRxiv preprint doi: <https://doi.org/10.1101/170415>; this version posted July 31, 2017. The copyright holder for this preprint (which was not certified by peer review) is the author/funder. All rights reserved. No reuse allowed without permission.

Angiosperms

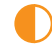

*Picea glauca*

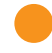

*Picea abies*

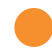

*Pinus sylvestris*

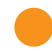

*Pinus taeda*

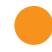

*Pinus lambertiana*

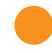

*Abies sibirica*

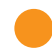

*Taxus baccata*

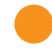

*Juniperus communis*

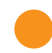

*Gnetum gnemon*

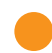

*Ginkgo biloba*

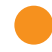

*Cystopteris protrusa*

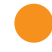

*Polypodium glycyrrhiza*

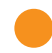

*Pteridium aquilinum*

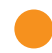

*Ceratopteris richardii*

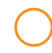

*Plagiogyria formosana*

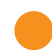

*Dipteris conjugata*

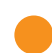

*Selaginella moellendorffii*

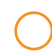

*Physcomitrella patens*

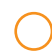

*Marchantia polymorpha*

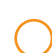

*Klebsormidium flaccidum*

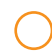

Gymnosperms

Euphyllophytes

Ferns

Vascular plants

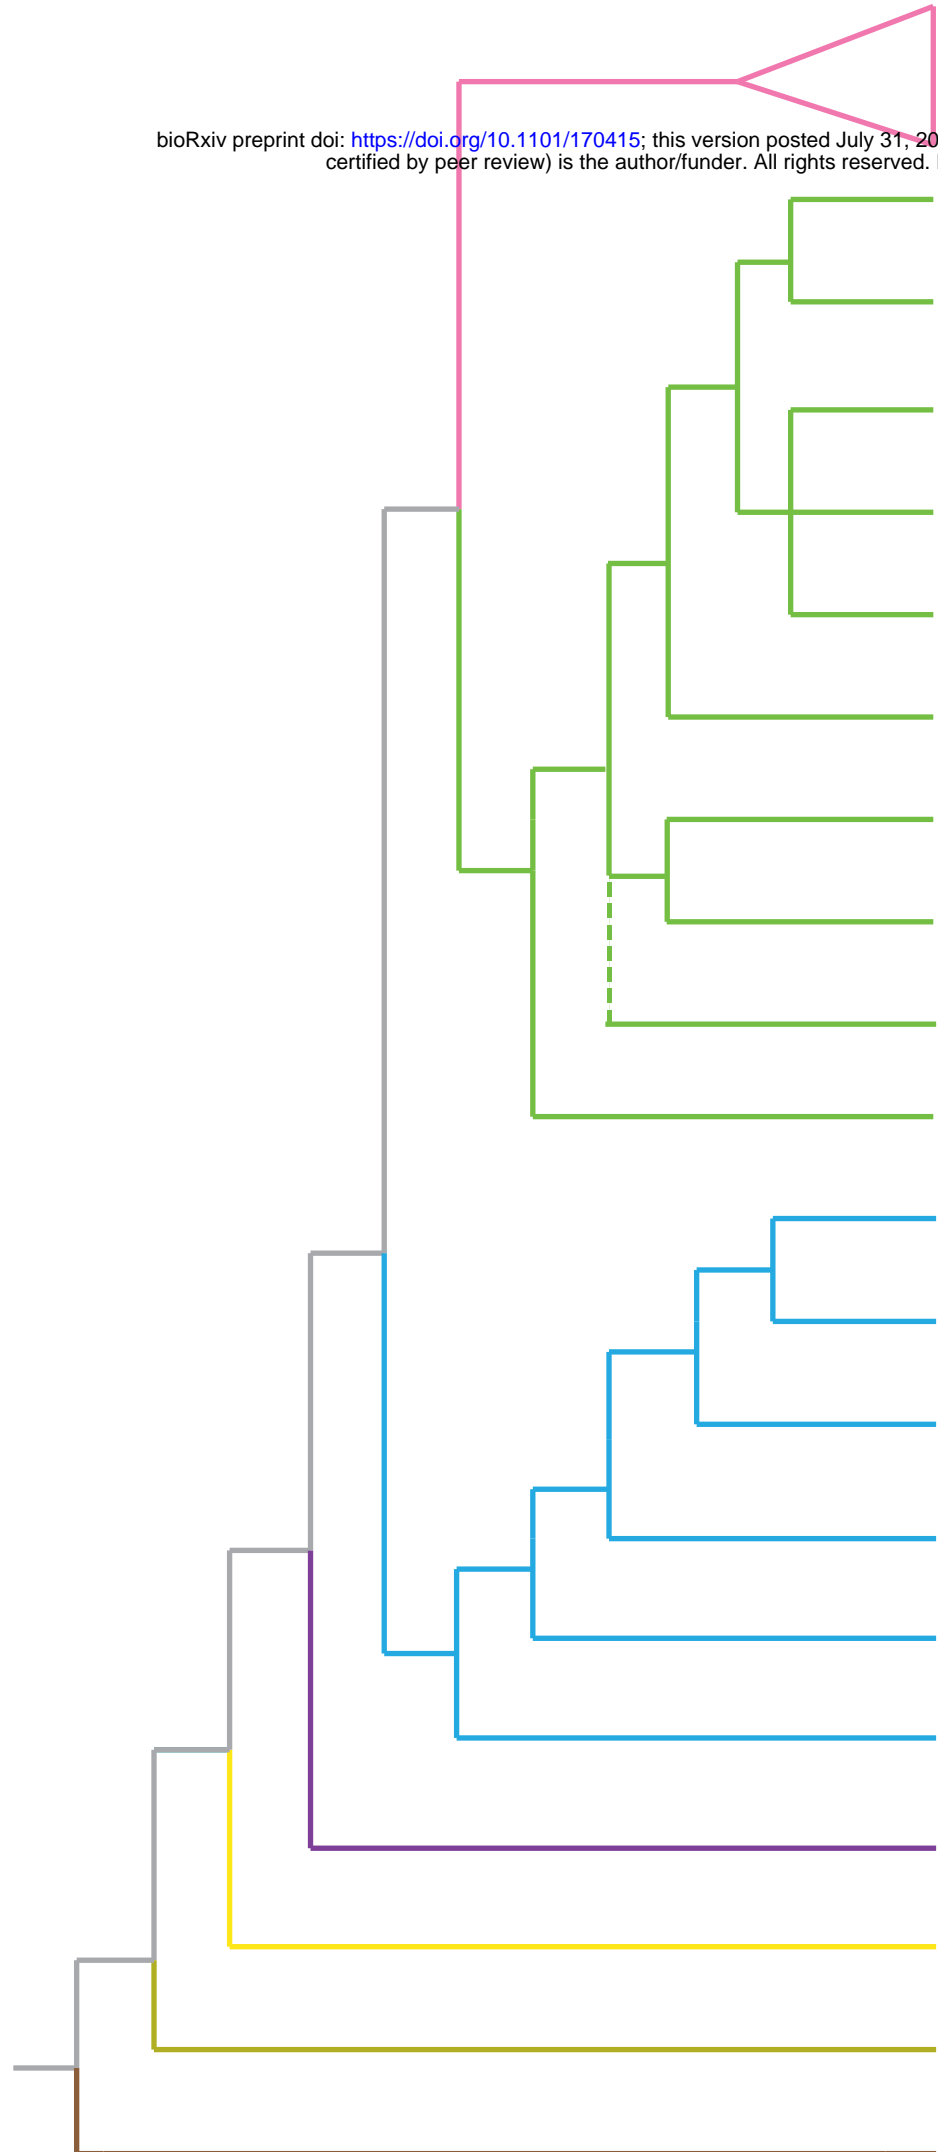

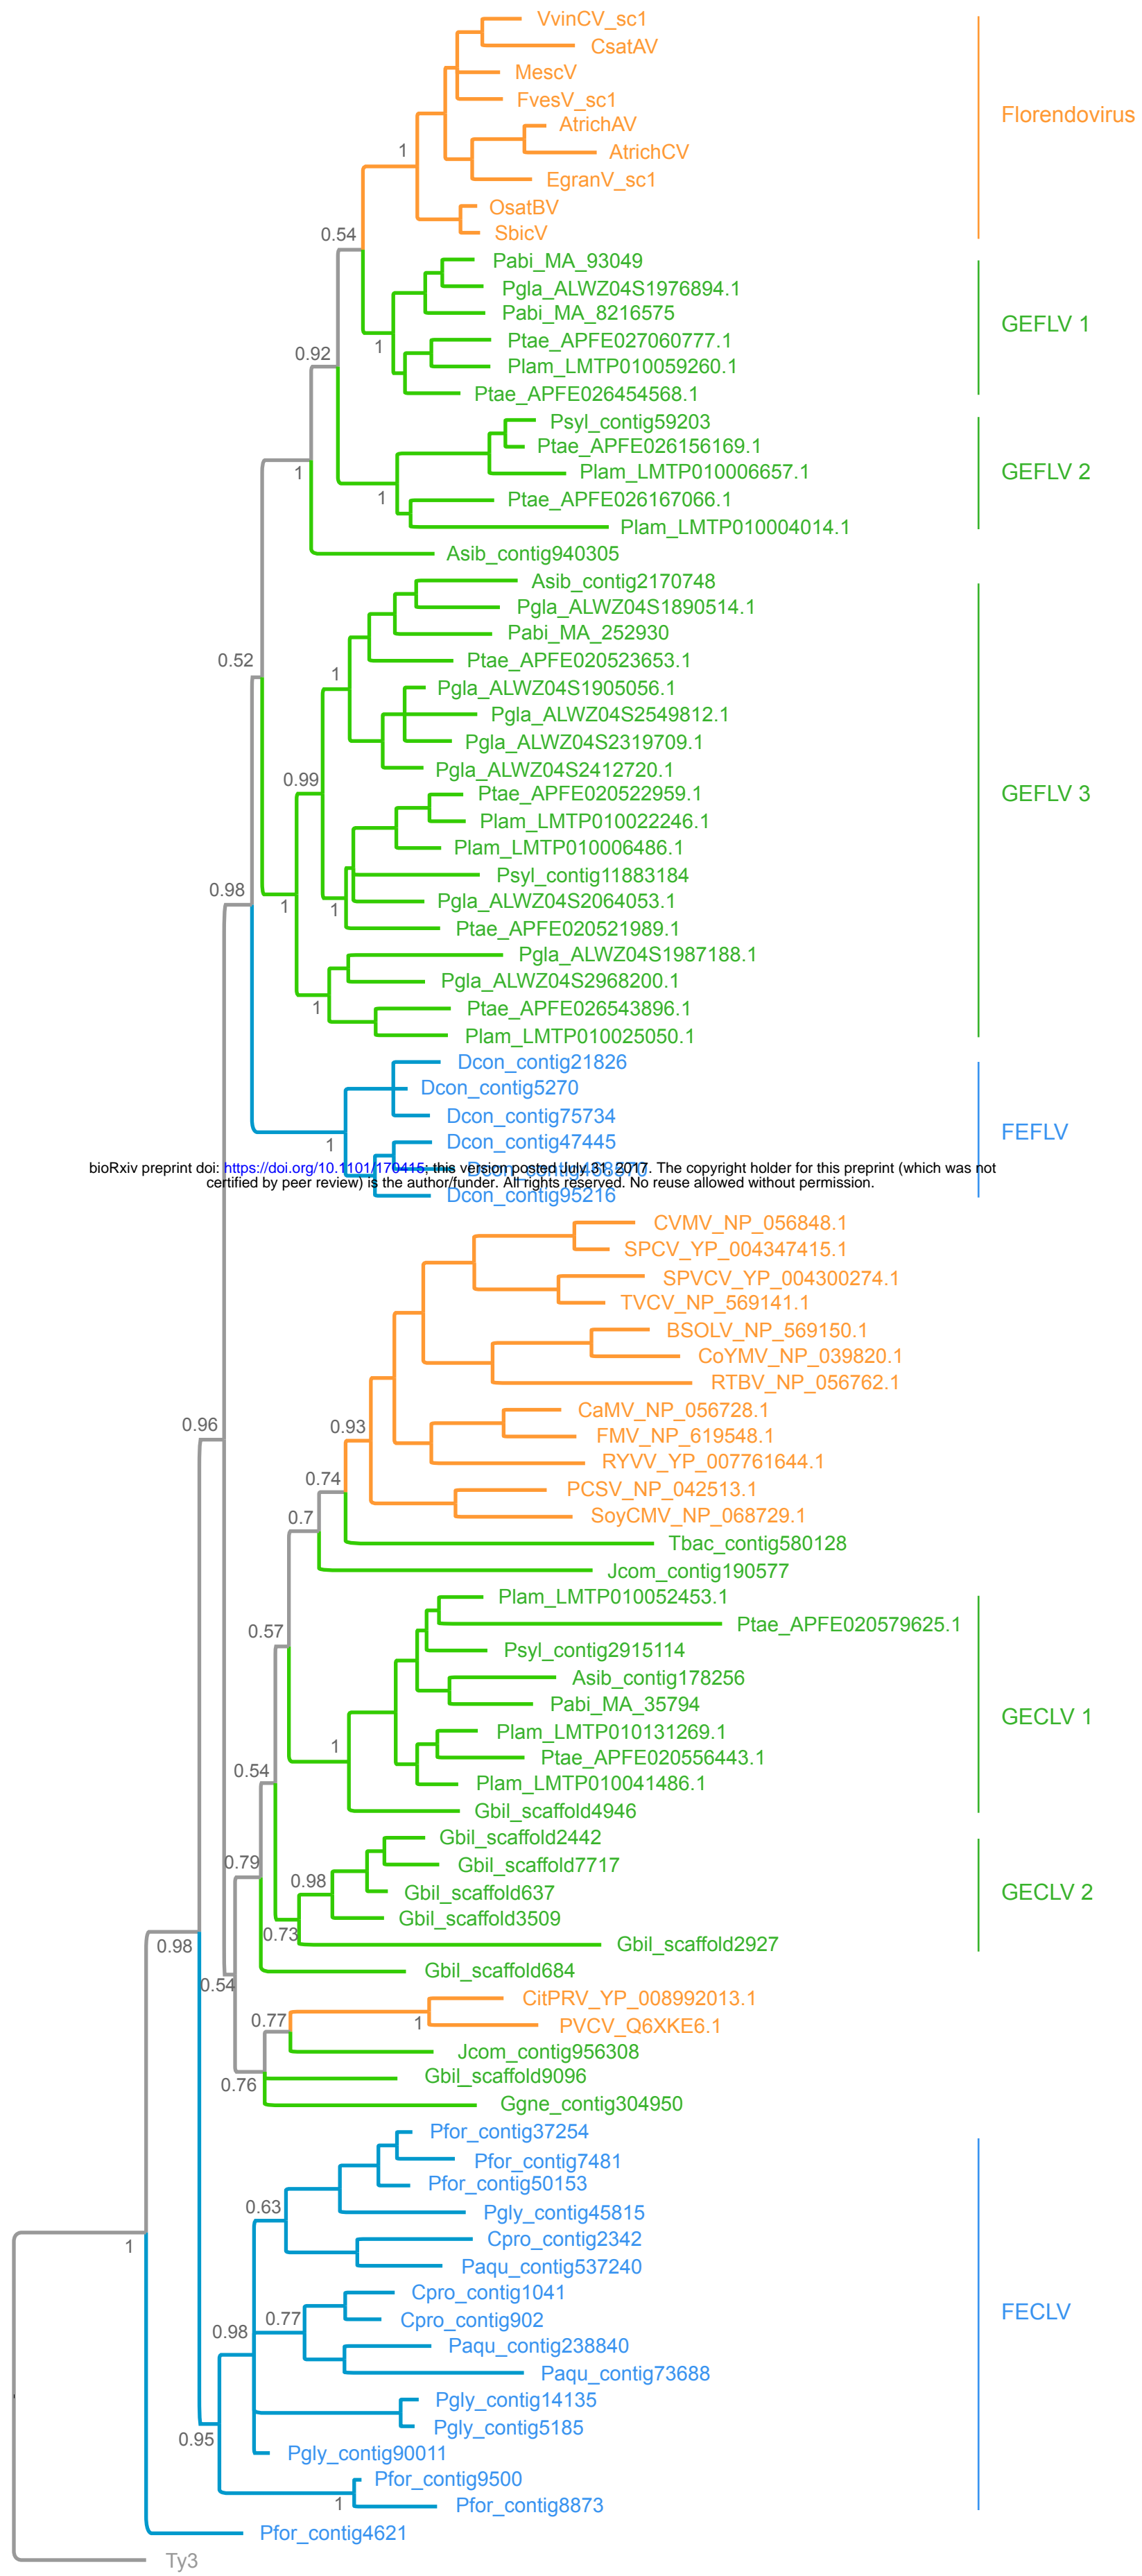

bioRxiv preprint doi: <https://doi.org/10.1101/170445>; this version posted July 31, 2017. The copyright holder for this preprint (which was not certified by peer review) is the author/funder. All rights reserved. No reuse allowed without permission.



PVCV (7,206 bps)

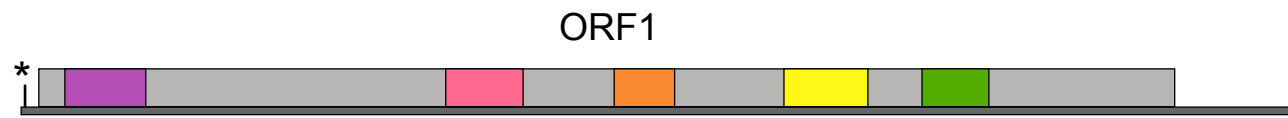

RTBV (8,002 bps)

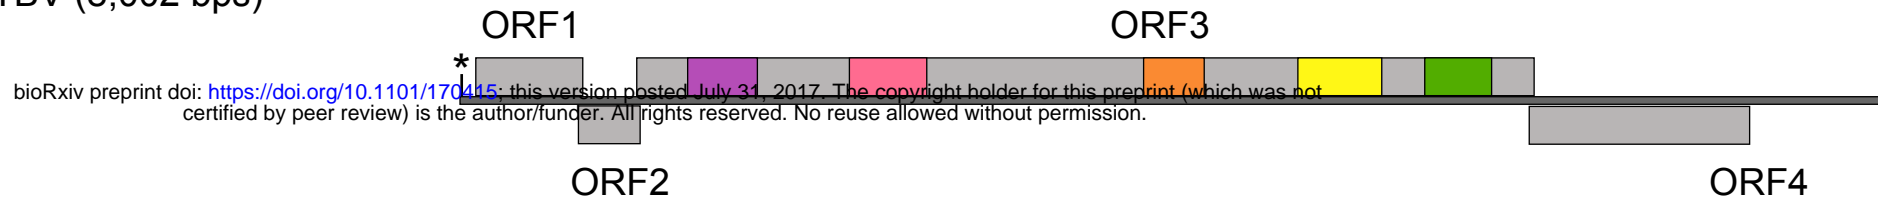

GEFLV 1: Pglav\_1 (7,421 bps)

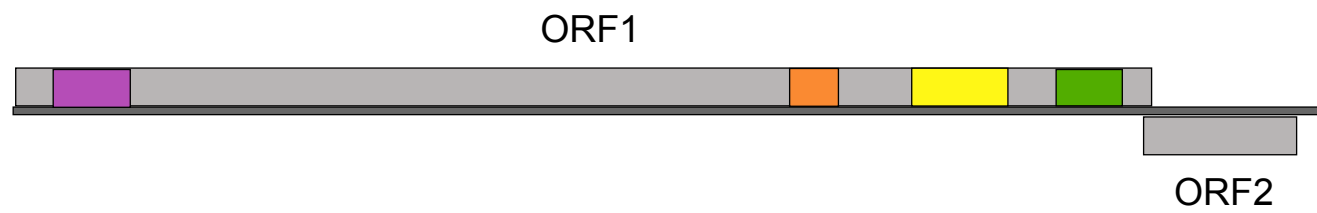

GEFLV 2: Ptaev\_1 (8,109 bps)

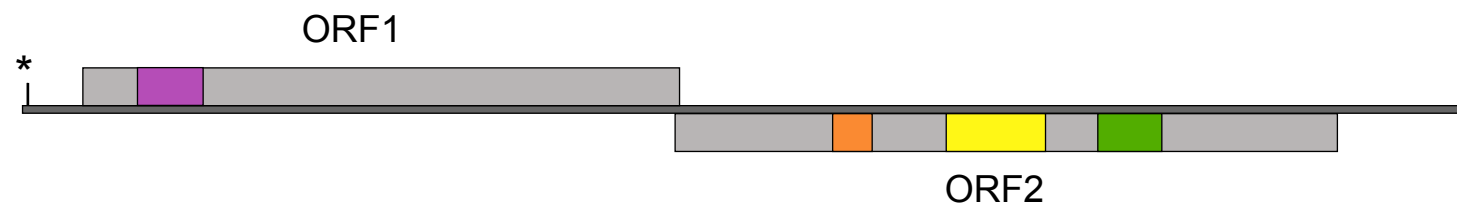

GEFLV 3: Pglav\_2 (7,219 bps)

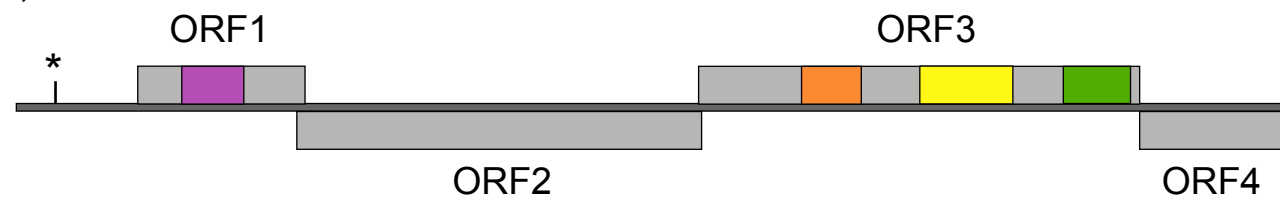

GECLV 1: Ptaev\_2 (6,061 bps)

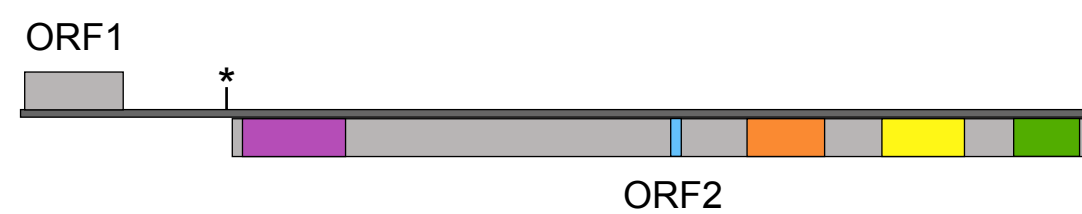

GECLV 2: Gbilv (6,081 bps)

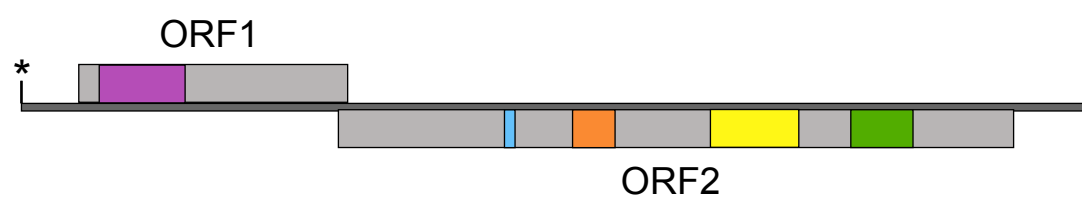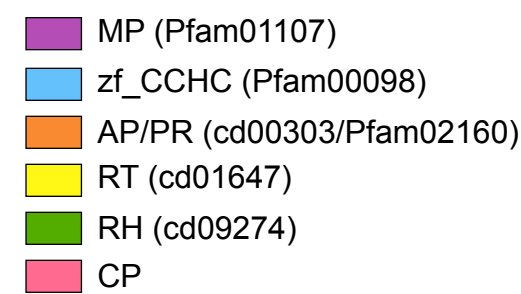

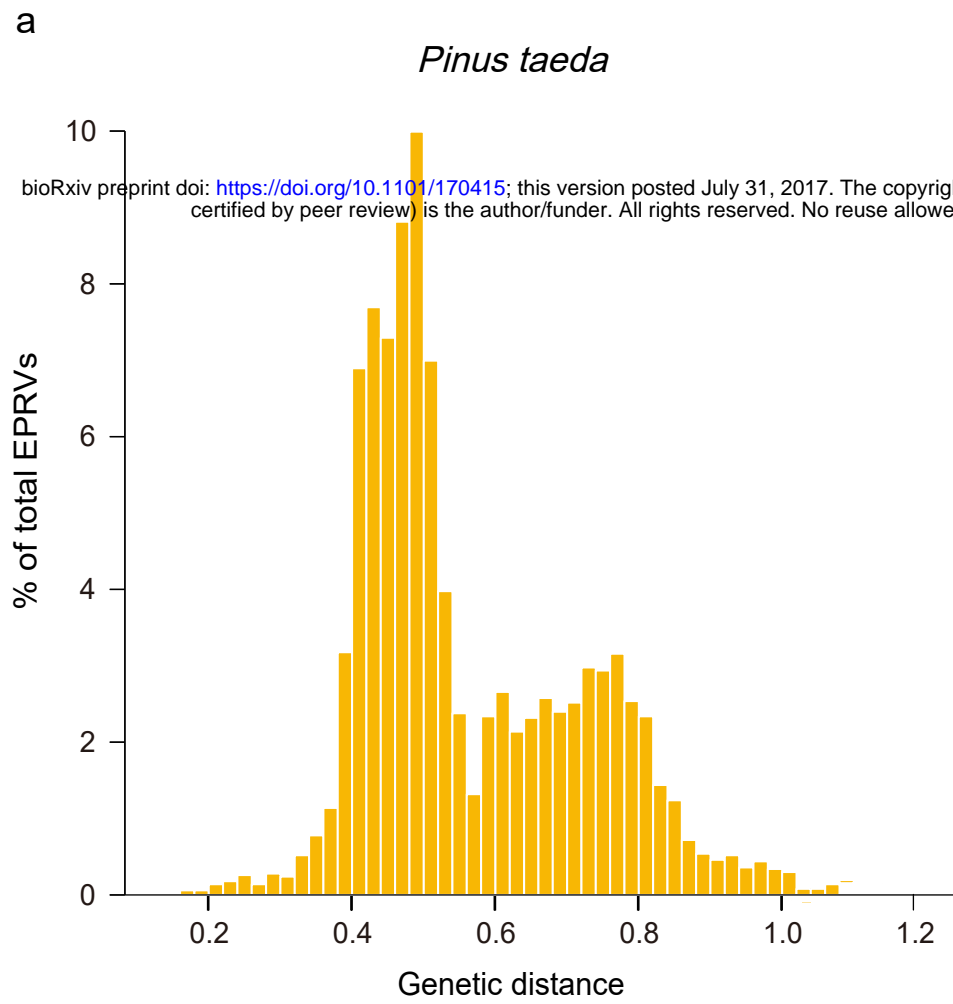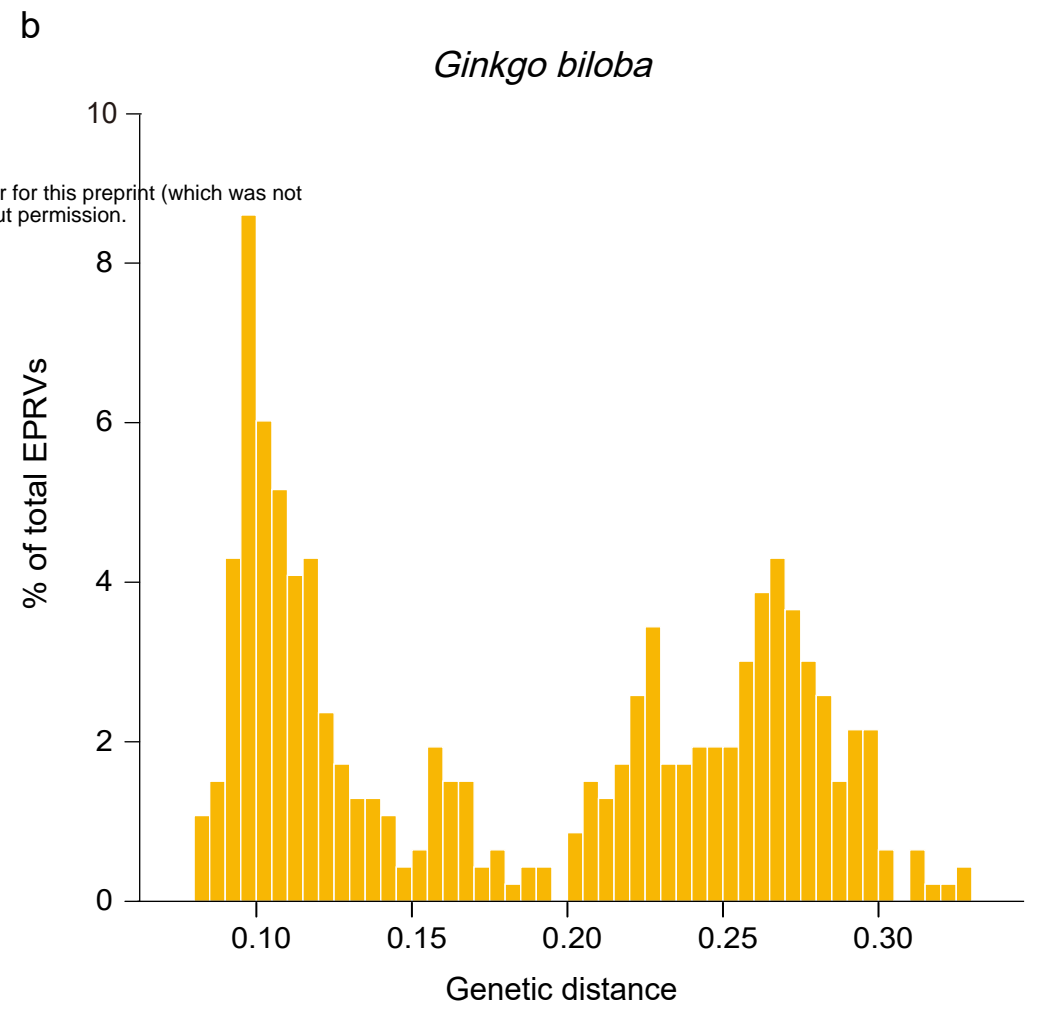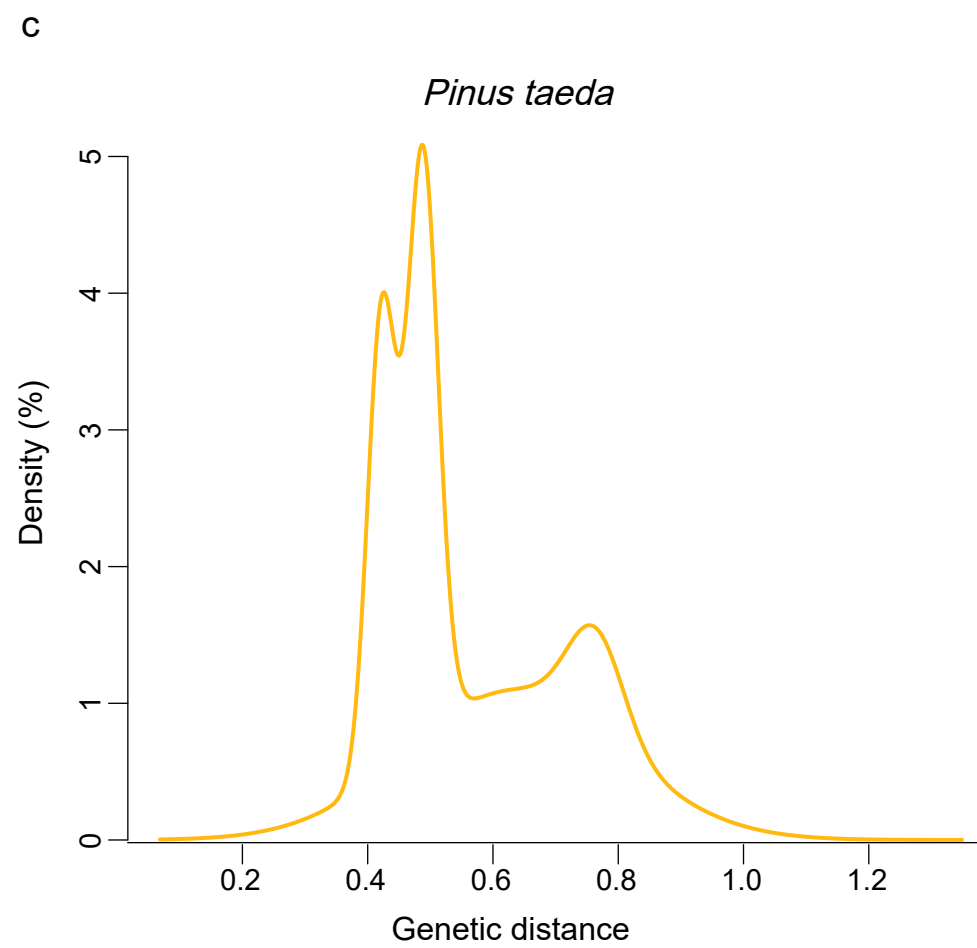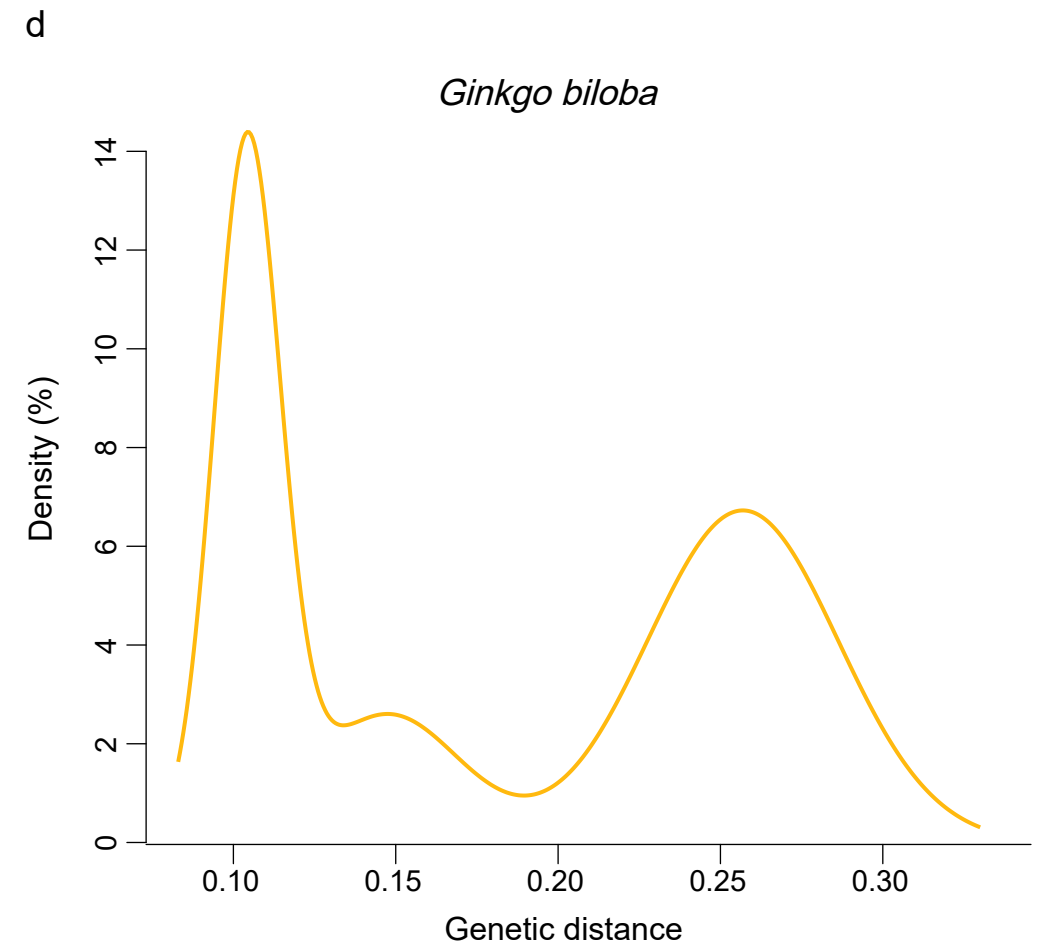

a

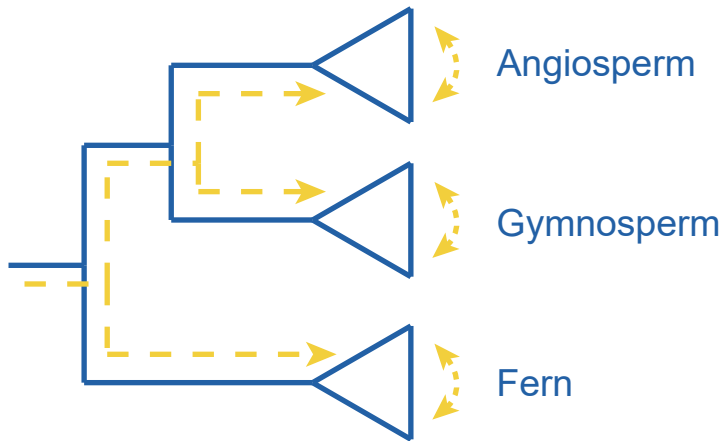

b

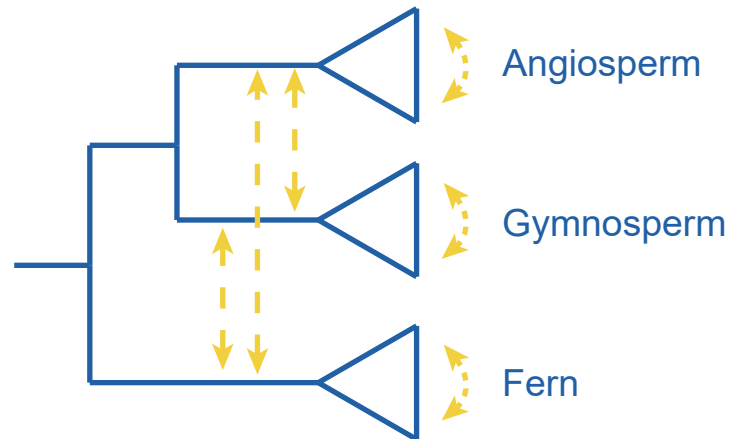

Source: https://www.biorxiv.org/content/10.1101/170415v1.full.pdf
